# Supplementary material for: Sulfated mesoporous Au/TiO2 spheres as a highly active and stable solid acid catalyst
Source: Royal Society of Chemistry journal article supplement (doi:10.1039/c2jm16921e), 2012-01-01
Supplement: c2jm16921e.pdf [file c2jm16921e.pdf]

## Sulfated Mesoporous Au/TiO<sub>2</sub> Spheres as a Highly Active and Stable Solid Acid Catalyst

Cheng Chao Li,<sup>a</sup> Yan Ping Zheng<sup>b</sup>, Tai Hong Wang<sup>\*a</sup>

<sup>a</sup>Key Laboratory for Micro-Nano Optoelectronic Devices of Ministry of Education and State Key Laboratory of Chemo/Biosensing and Chemometrics, Hunan University, Changsha, 410082, P. R. China

<sup>b</sup>State Key Laboratory of Physical Chemistry of Solid Surfaces, College of Chemistry and Chemical Engineering, Xiamen University, Xiamen, 361005, China

\* Tel: +86-0731-88823407; Fax: +86-0731-88822137.

E-mail address: [thwang@aphy.iphy.ac.cn](mailto:thwang@aphy.iphy.ac.cn) (T. H. Wang).

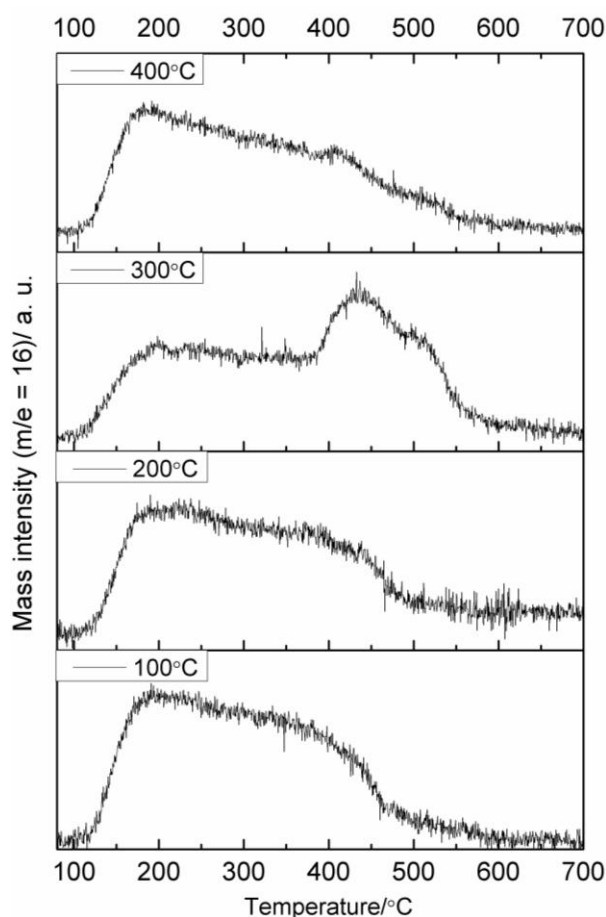

**Figure SI-1.** NH<sub>3</sub>-TPD (m/e=16) curves for sulfated MTOS-based solid acid catalysts (heat-treated at 100 °C to 400 °C respectively for 4 h).

Supporting Information

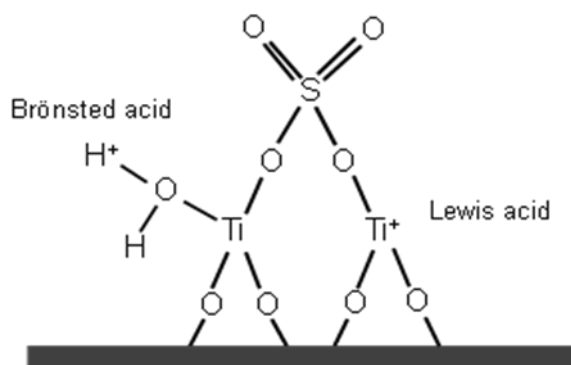

**Figure SI-2.** Lewis and Brønsted acid sites of a sulfated titania.<sup>1-4</sup>

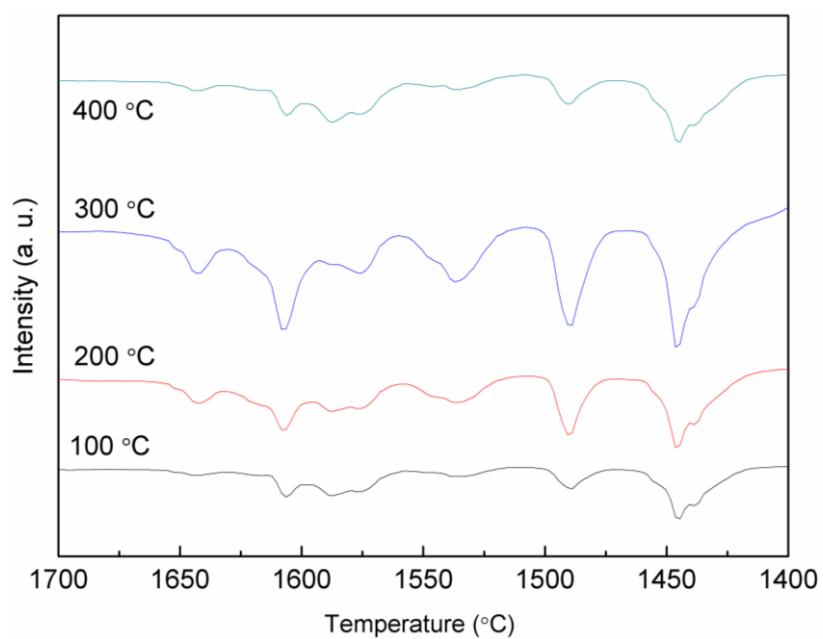

**Figure SI-3.** Adsorbed pyridine infrared spectra of as-prepared catalysts.

## Supporting Information

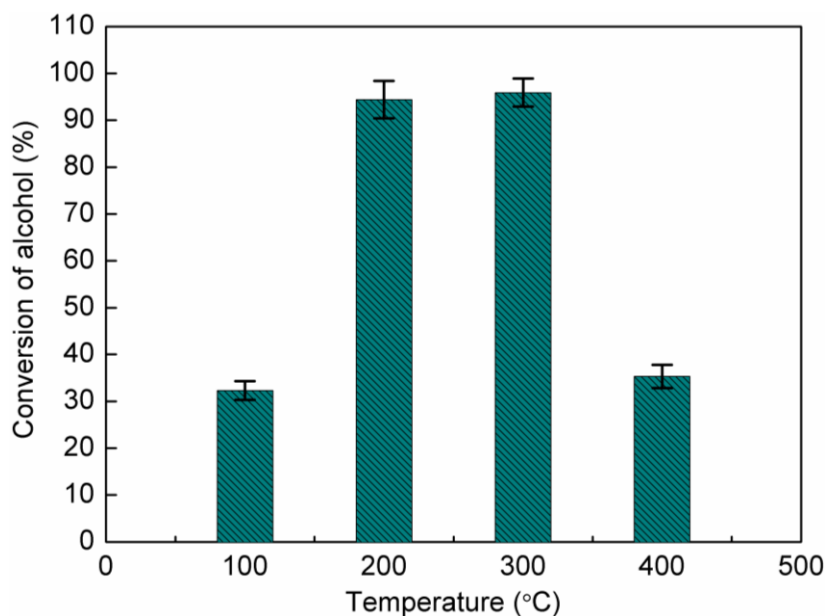

**Figure 11.** The catalytic activity of the sulfated MTOS treated at 100 to 400 °C.

**Table 1. Friedel-Crafts Alkylation of toluene using our mesoporous TiO<sub>2</sub>-based solid acid catalysts**

**Reaction conditions:** 50.0 mL of toluene + 5.0 mL of benzyl alcohol + 0.5 g of catalyst + 0.5 mL of hexadecane (internal standard) at 130°C. Selectivity of methyl-diphenylmethane (i.e., the total sum of 1-methyl-4-(phenylmethyl)-benzene, 1-methyl-2-(phenylmethyl)-benzene, and 1-methyl-3-(phenylmethyl)-benzene) was determined at (a) 30 min and (b) 1 h after the reaction.

| Catalyst            | S <sub>BET</sub> (m <sup>2</sup> ·g <sup>-1</sup> ) | Acid amount (mmol·g <sup>-1</sup> ) | Conversion (%) <sup>a</sup> | Reaction rate (mmol·g <sup>-1</sup> ·h <sup>-1</sup> ) | Selectivity (methyl-diphenylmethane, %) |
|---------------------|-----------------------------------------------------|-------------------------------------|-----------------------------|--------------------------------------------------------|-----------------------------------------|
| Sulfated MTOS-400°C | 123.4                                               | 1.83                                | 36.5                        | 58.3                                                   | 24.8, <sup>a</sup> 45.0 <sup>b</sup>    |
| Sulfated MTOS-300°C | 153.3                                               | 3.28                                | >99                         | 189.7                                                  | 45.0, <sup>a</sup> 84.3 <sup>b</sup>    |
| Sulfated MTOS-200°C | 148.9                                               | 2.94                                | >99                         | 189.7                                                  | 45.2, <sup>a</sup> 82.2 <sup>b</sup>    |
| Sulfated MTOS-100°C | 155.0                                               | 1.61                                | 30.1                        | 64.9                                                   | 20.2, <sup>a</sup> 26.8 <sup>b</sup>    |

## Supporting Information

**Table 2. Esterification of Acetic Acid with Ethanol and Hydrolysis of Ethyl Acetate**

**Reaction conditions:**

**Esterification:** 0.1 mol of acetic acid + 1 mol of ethanol + 0.2 g of catalyst, at 70 °C for 4 h.

**Hydrolysis:** 50 mmol of ethyl acetate + 10.0 mL of water + 0.1 g of catalyst, at 70 °C for 4 h. TOF is defined as the number of moles of reactants that one mol of acid sites converts to products in per unit of time.

| Catalyst            | S <sub>BET</sub><br>(m <sup>2</sup> ·g <sup>-1</sup> ) | Acid amount<br>(mmol·g <sup>-1</sup> ) | Esterification of acetic acid                               |                           | Hydrolysis of ethyl acetate                                 |                           |
|---------------------|--------------------------------------------------------|----------------------------------------|-------------------------------------------------------------|---------------------------|-------------------------------------------------------------|---------------------------|
|                     |                                                        |                                        | Reaction rate<br>(mmol·g <sup>-1</sup> ·min <sup>-1</sup> ) | TOF<br>(h <sup>-1</sup> ) | Reaction rate<br>(mmol·g <sup>-1</sup> ·min <sup>-1</sup> ) | TOF<br>(h <sup>-1</sup> ) |
| Sulfated MTOS-400°C | 123.4                                                  | 1.83                                   | 1.20                                                        | 39.3                      | 0.28                                                        | 9.2                       |
| Sulfated MTOS-300°C | 153.3                                                  | 3.28                                   | 1.35                                                        | 24.7                      | 0.32                                                        | 5.9                       |
| Sulfated MTOS-200°C | 148.9                                                  | 2.94                                   | 1.32                                                        | 26.9                      | 0.32                                                        | 6.5                       |
| Sulfated MTOS-100°C | 155.0                                                  | 1.61                                   | 1.28                                                        | 47.7                      | 0.30                                                        | 11.2                      |

**References:**

- [1] A. Corma, *Chem. Rev.* **1995**, *95*, 559.
- [2] K. Nakamoto, *Infrared and Raman Spectra of Inorganic and Coordination Compounds*, John Wiley & Sons, New York, **1986**.
- [3] T. Yamaguchi, *Appl. Catal. A: Gen.* **1990**, *61*, 1.
- [4] K. Arata, *Advance in catalysis* **1990**, *37*, 165.
